# Supplementary material for: An International Non-Inferiority Study for the Benchmarking of AI for Routine Radiology Cases: Chest X-ray, Fluorography and Mammography
Source: MDPI journal article supplement (doi:10.3390/healthcare11121684), 2023-06-08
Supplement: s1 [file s1]

Table S1. Details of AI models

| Modality | AI model                        | Architectures                                                                          | Dataset                                                                                               | Source |
|----------|---------------------------------|----------------------------------------------------------------------------------------|-------------------------------------------------------------------------------------------------------|--------|
| X-ray    | Lunit INSIGHT CXR               | Not provided                                                                           | 54 221 normal chest radiographs and 35 613 chest radiographs in patients with major thoracic diseases | [23]   |
|          | LLC "FtizisBioMed"              | Not provided                                                                           | Not provided                                                                                          | [24]   |
|          | CareMentor.AI                   | Inception-V3 and ResNet-50                                                             | 276840 frontal X-ray images of lungs                                                                  | [25]   |
|          | AI RADIOLOGY CXR                | an ensemble of RetinaNet and Mask R-CNN                                                | 26,684 unique CXR                                                                                     | [26]   |
| FLG      | LLC "FtizisBioMed"              | Not provided                                                                           | Not provided                                                                                          | [24]   |
|          | LLC «Medical Screening Systems» | Not provided                                                                           | Not provided                                                                                          | [27]   |
| MMG      | Lunit INSIGHT MMG               | ResNet-34                                                                              | 31 604 cancer-positive mammograms and 19 625 benign mammograms                                        | [28]   |
|          | LLC «Medical Screening Systems» | an ensemble of deep ultra-precise neural networks combined with an aggregation module. | Not provided                                                                                          | [29]   |

Table S2. Diagnostic performance metrics per AI model

| Modality | AI model                        | AUROC<br>(CI 95%)   | Sensitivity*<br>(CI 95%) | Specificity*<br>(CI 95%) |
|----------|---------------------------------|---------------------|--------------------------|--------------------------|
| X-ray    | Lunit INSIGHT CXR               | 0.94<br>(0.87-1.0)  | 0.90<br>(0.79-1.0)       | 0.89<br>(0.79-0.98)      |
|          | LLC "FtizisBioMed"              | 0.77<br>(0.66-0.88) | 0.83<br>(0.69-0.96)      | 0.71<br>(0.58-0.85)      |
|          | CareMentor.AI                   | 0.88<br>(0.81-0.96) | 0.76<br>(0.60-0.91)      | 0.91<br>(0.82-0.99)      |
|          | AI RADIOLOGY CXR                | 0.87<br>(0.80-0.95) | 0.83<br>(0.71-0.94)      | 0.89<br>(0.80-0.98)      |
| FLG      | LLC "FtizisBioMed"              | 0.89<br>(0.83-0.96) | 0.79<br>(0.68-0.91)      | 0.92<br>(0.84-0.99)      |
|          | LLC «Medical Screening Systems» | 0.82<br>(0.73-0.91) | 0.71<br>(0.58-0.84)      | 0.90<br>(0.81-0.98)      |
| MMG      | Lunit INSIGHT MMG               | 0.96<br>(0.92-0.99) | 0.83<br>(0.73-0.94)      | 0.96<br>(0.91-1.0)       |
|          | LLC «Medical Screening Systems» | 0.81<br>(0.72-0.89) | 0.62<br>(0.48-0.76)      | 0.92<br>(0.84-0.99)      |

\* at the operating point of maximum Youden index
